# Supplementary material for: Enhanced solar photothermal effect of PANi fabrics with plasmonic nanostructures
Source: PubMed Central journal article supplement — RSC Adv. 2020 Jul 31;10(47):28447–53. doi: 10.1039/d0ra04558f (PMC9055669; doi:10.1039/d0ra04558f), 2020-07-31
Supplement: RA-010-D0RA04558F-s001.pdf [file RA-010-D0RA04558F-s001.pdf]

## Supplemental material

Do T. Nga,<sup>1</sup> Anh D. Phan,<sup>2,3,\*</sup> Vu D. Lam,<sup>4</sup> Lilia M. Woods,<sup>5</sup> and Katsunori Wakabayashi<sup>3</sup>

<sup>1</sup>*Institute of Physics Vietnam Academy of Science and Technology,  
10 Dao Tan, Ba Dinh, Hanoi 10000, Vietnam<sup>†</sup>*

<sup>2</sup>*Phenikaa Institute for Advanced Study,  
Artificial Intelligence Laboratory, Faculty of Computer Science,  
Materials Science and Engineering,  
Phenikaa University, Hanoi 12116, Vietnam*

<sup>3</sup>*Department of Nanotechnology for Sustainable Energy, School of Science and Technology,  
Kwansei Gakuin University, Sanda, Hyogo 669-1337, Japan*

<sup>4</sup>*Graduate University of Science and Technology,  
Vietnam Academy of Science and Technology,  
18 Hoang Quoc Viet, Hanoi, Vietnam*

<sup>5</sup>*Department of Physics, University of South Florida,  
Tampa, Florida 33620, United States*

PACS numbers:

---

\*Electronic address: anh.phanduc@phenikaa-uni.edu.vn

<sup>†</sup>Electronic address: dtnga@iop.vast.ac.vn

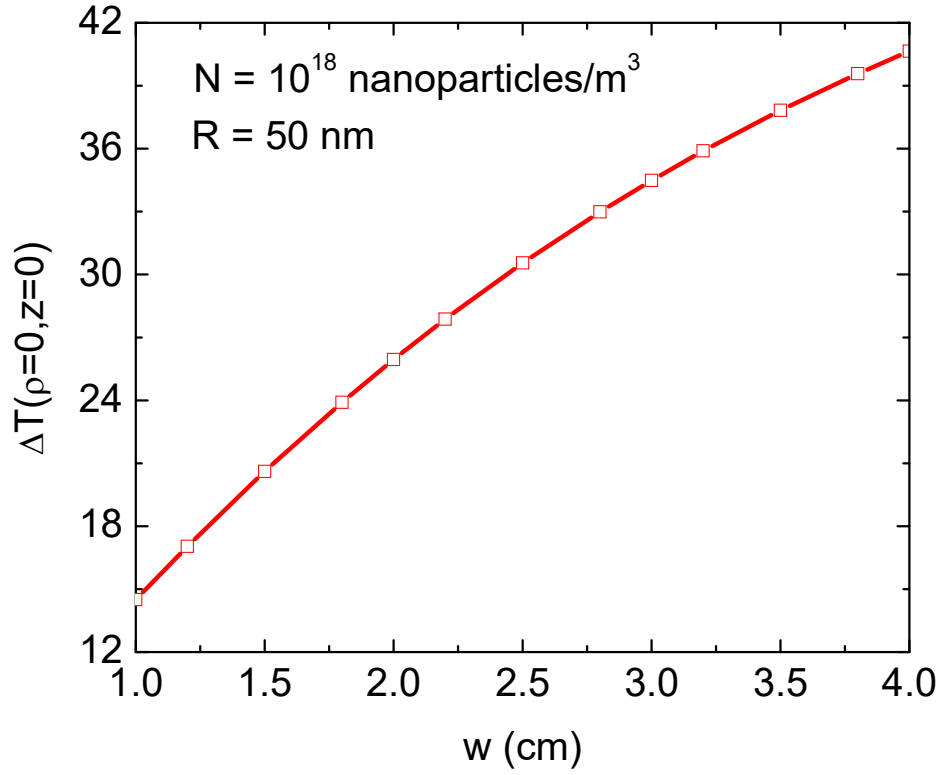

FIG. 1: (Color online) The maximum surface temperature as a function of the effective projected size,  $w$ , of floating fabrics on a solution of TiN nanoparticle with  $N = 10^{18}$  nanoparticles/m<sup>3</sup> and  $R = 50$  nm.

Figure S1 shows the temperature gradient  $\Delta T(\rho = 0, z = 0)$  with  $w$  for  $N = 10^{18}$  nanoparticles/m<sup>3</sup> concentration of TiN nanoparticles with 50-nm radius.
